# Supplementary material
Source: publisher figshare collection journal article supplement (https://plos.figshare.com/articles/dataset/_/15120971)
Supplement: Supplementary file [file 29060744]

**Table S2: Metabolomics comparisons in p53-activated cells (+Nutlin, 20 hr)**

**KEY:**

**0.55** **Green:** significant difference ( $p \leq 0.05$ ) between groups shown, metabolite ratio of  $< 1.00$

**0.76** **Light Green:** statistical significance  $0.05 < p < 0.10$ , metabolite ratio of  $< 1.00$

**1.71** **Red:** significant difference ( $p \leq 0.05$ ) between groups shown; metabolite ratio of  $\geq 1.00$

**1.32** **Light Red:** statistical significance  $0.05 < p < 0.10$ , metabolite ratio of  $\geq 1.00$

**1.20** **Non-colored text and cell:** mean values not significantly different for that comparison

| Super Pathway                  | Sub Pathway                              | Biochemical Name              | Nutlin<br>WTp53:WTp53 | Nutlin<br>$\Delta 40p53$ :WTp53 |
|--------------------------------|------------------------------------------|-------------------------------|-----------------------|---------------------------------|
| Amino Acid                     | Glycine, Serine and Threonine Metabolism | glycine                       | 1.17                  | 1.03                            |
|                                |                                          | betaine                       | 0.80                  | <b>11.69</b>                    |
|                                |                                          | serine                        | <b>1.20</b>           | 1.01                            |
|                                |                                          | N-acetylserine                | 1.00                  | 1.13                            |
|                                |                                          | threonine                     | 1.13                  | 1.03                            |
|                                |                                          | N-acetylthreonine             | <b>1.58</b>           | 1.47                            |
|                                | Alanine and Aspartate Metabolism         | alanine                       | 1.08                  | 0.95                            |
|                                |                                          | N-acetylalanine               | 0.78                  | 0.83                            |
|                                |                                          | aspartate                     | <b>0.86</b>           | 0.88                            |
|                                |                                          | N-acetylaspartate (NAA)       | <b>1.81</b>           | <b>2.31</b>                     |
|                                |                                          | asparagine                    | 1.07                  | 0.88                            |
|                                | Glutamate Metabolism                     | glutamate                     | <b>1.25</b>           | 1.01                            |
|                                |                                          | glutamine                     | 0.90                  | 0.75                            |
|                                |                                          | N-acetylglutamate             | 1.01                  | 0.85                            |
|                                |                                          | N-acetylglutamine             | 0.85                  | 0.78                            |
|                                |                                          | glutamate, gamma-methyl ester | 0.82                  | <b>0.70</b>                     |
|                                |                                          | pyroglutamine*                | 0.87                  | <b>0.75</b>                     |
|                                |                                          | beta-citrylglutamate          | <b>1.33</b>           | <b>1.56</b>                     |
|                                | Histidine Metabolism                     | S-1-pyrroline-5-carboxylate   | <b>1.71</b>           | 1.10                            |
|                                |                                          | histidine                     | 0.96                  | 0.88                            |
|                                |                                          | formiminoglutamate            | <b>1.52</b>           | 1.23                            |
|                                |                                          | imidazole lactate             | <b>0.59</b>           | 0.89                            |
|                                | Lysine Metabolism                        | 4-imidazoleacetate            | 0.75                  | 0.68                            |
|                                |                                          | lysine                        | 1.05                  | 0.84                            |
|                                |                                          | N6-acetyllysine               | 1.14                  | 1.10                            |
|                                |                                          | N6-methyllysine               | 1.14                  | 1.02                            |
|                                |                                          | N6,N6-dimethyllysine          | 1.18                  | 0.94                            |
| N6,N6,N6-trimethyllysine       |                                          | 1.12                          | 0.98                  |                                 |
| 5-(galactosylhydroxy)-L-lysine |                                          | 0.99                          | <b>0.51</b>           |                                 |
| Amin Acid                      | Phenylalanine Metabolism                 | phenylalanine                 | 1.12                  | 0.96                            |
|                                | Tyrosine Metabolism                      | tyrosine                      | 1.13                  | 0.97                            |

|                                                  |                                |             |             |
|--------------------------------------------------|--------------------------------|-------------|-------------|
|                                                  | 3-(4-hydroxyphenyl)lactate     | 0.95        | 1.02        |
|                                                  | phenol sulfate                 | <b>3.71</b> | <b>2.78</b> |
|                                                  | O-methyltyrosine               | 0.90        | 0.81        |
|                                                  | N-formylphenylalanine          | 1.32        | 1.44        |
| Tryptophan Metabolism                            | tryptophan                     | 0.95        | 0.91        |
|                                                  | kynurenine                     | 1.07        | 1.04        |
| Leucine, Isoleucine and Valine Metabolism        | leucine                        | 1.09        | 0.93        |
|                                                  | isovalerylcarnitine (C5)       | <b>1.72</b> | 1.10        |
|                                                  | beta-hydroxyisovalerate        | 1.21        | 1.03        |
|                                                  | isoleucine                     | 1.09        | 0.91        |
|                                                  | 2-methylbutyrylcarnitine (C5)  | <b>1.50</b> | 0.81        |
|                                                  | tiglylcarnitine (C5:1-DC)      | 1.01        | 1.16        |
|                                                  | methylsuccinate                | 1.25        | 0.80        |
|                                                  | valine                         | 1.05        | 0.98        |
|                                                  | alpha-hydroxyisovalerate       | 0.99        | 0.87        |
|                                                  | isobutyrylcarnitine (C4)       | <b>2.02</b> | <b>1.42</b> |
| Methionine, Cysteine, SAM and Taurine Metabolism | methionine                     | 1.03        | 0.89        |
|                                                  | N-acetylmethionine             | 0.92        | 1.02        |
|                                                  | N-formylmethionine             | 1.03        | 1.00        |
|                                                  | methionine sulfoxide           | <b>1.22</b> | 0.90        |
|                                                  | N-acetylmethionine sulfoxide   | 1.14        | 0.87        |
|                                                  | S-adenosylhomocysteine (SAH)   | 0.98        | 0.96        |
|                                                  | cystathionine                  | 0.68        | <b>1.68</b> |
|                                                  | cysteine                       | 1.05        | 0.83        |
|                                                  | N-acetylcysteine               | 1.15        | 1.15        |
|                                                  | S-methylcysteine               | 1.19        | 0.99        |
|                                                  | cystine                        | 1.04        | 0.60        |
|                                                  | cysteine sulfinic acid         | <b>1.24</b> | 0.89        |
|                                                  | hypotaurine                    | <b>0.41</b> | 1.07        |
|                                                  | taurine                        | 0.89        | 1.04        |
| Urea cycle; Arginine and Proline Metabolism      | arginine                       | 1.06        | <b>0.82</b> |
|                                                  | argininosuccinate              | 1.11        | 1.04        |
|                                                  | urea                           | <b>2.31</b> | <b>1.36</b> |
|                                                  | ornithine                      | <b>3.05</b> | 1.27        |
|                                                  | 2-oxoarginine*                 | 0.74        | 0.82        |
|                                                  | citrulline                     | 1.52        | <b>2.55</b> |
|                                                  | proline                        | 0.96        | 0.92        |
|                                                  | dimethylarginine (SDMA + ADMA) | 1.13        | 0.92        |
|                                                  | trans-4-hydroxyproline         | 1.14        | 1.07        |
|                                                  | N-monomethylarginine           | <b>1.18</b> | 0.94        |
| Creatine Metabolism                              | guanidinoacetate               | <b>0.10</b> | <b>0.08</b> |
|                                                  | creatine                       | 0.77        | 0.99        |
|                                                  | creatinine                     | 0.88        | 0.87        |

|                         |                                                      |                                                                            |                        |      |
|-------------------------|------------------------------------------------------|----------------------------------------------------------------------------|------------------------|------|
| Amino Acid              | Polyamine Metabolism                                 | putrescine                                                                 | 1.63                   | 1.01 |
|                         |                                                      | N-acetylputrescine                                                         | 3.07                   | 1.48 |
|                         |                                                      | spermidine                                                                 | 0.49                   | 0.85 |
|                         |                                                      | (N(1) + N(8))-acetylspermidine                                             | 1.62                   | 0.23 |
|                         |                                                      | spermine                                                                   | 0.60                   | 0.90 |
|                         |                                                      | N(1)-acetylspermine                                                        | 0.63                   | 0.21 |
|                         |                                                      | 5-methylthioadenosine (MTA)                                                | 0.95                   | 0.82 |
|                         | Guanidino and Acetamido Metabolism                   | 4-guanidinobutanoate                                                       | 1.13                   | 1.00 |
|                         | Glutathione Metabolism                               | glutathione, reduced (GSH)                                                 | 0.44                   | 0.98 |
|                         |                                                      | glutathione, oxidized (GSSG)                                               | 0.62                   | 1.03 |
|                         |                                                      | cysteine-glutathione disulfide                                             | 0.94                   | 0.83 |
|                         |                                                      | 5-oxoproline                                                               | 0.95                   | 0.95 |
|                         | Peptide                                              | Gamma-glutamyl Amino Acid                                                  | gamma-glutamylcysteine | 0.48 |
| gamma-glutamylglutamine |                                                      |                                                                            | 1.05                   | 0.50 |
| gamma-glutamylleucine   |                                                      |                                                                            | 1.36                   | 1.01 |
| Dipeptide               |                                                      | alanylleucine                                                              | 0.97                   | 0.48 |
|                         |                                                      | glutaminylleucine                                                          | 1.01                   | 0.89 |
|                         |                                                      | glycylleucine                                                              | 1.49                   | 1.03 |
|                         |                                                      | glycylvaline                                                               | 0.99                   | 0.79 |
|                         |                                                      | histidylalanine                                                            | 1.13                   | 0.91 |
|                         |                                                      | isoleucylglycine                                                           | 1.17                   | 0.84 |
|                         |                                                      | leucylalanine                                                              | 1.44                   | 0.87 |
|                         |                                                      | leucylglycine                                                              | 1.55                   | 0.94 |
|                         |                                                      | phenylalanylalanine                                                        | 1.14                   | 0.74 |
|                         |                                                      | phenylalanylglycine                                                        | 1.24                   | 0.97 |
|                         |                                                      | prolylglycine                                                              | 0.95                   | 0.86 |
|                         |                                                      | threonylphenylalanine                                                      | 1.27                   | 0.76 |
|                         |                                                      | tryptophylglycine                                                          | 1.16                   | 0.83 |
|                         |                                                      | tyrosylglycine                                                             | 1.51                   | 1.08 |
|                         |                                                      | valylglutamine                                                             | 1.46                   | 0.84 |
|                         |                                                      | valylglycine                                                               | 1.32                   | 0.90 |
|                         |                                                      | valylleucine                                                               | 1.66                   | 0.77 |
| leucylglutamine*        | 1.20                                                 | 0.70                                                                       |                        |      |
| Acetylated Peptides     | phenylacetylglycine                                  | 0.99                                                                       | 1.05                   |      |
| Carbohydrate            | Glycolysis, Gluconeogenesis, and Pyruvate Metabolism | glucose                                                                    | 0.90                   | 0.70 |
|                         |                                                      | fructose 1,6-diphosphate/glucose 1,6-diphosphate/myo-inositol diphosphates | 1.12                   | 1.13 |
|                         |                                                      | dihydroxyacetone phosphate (DHAP)                                          | 1.12                   | 1.40 |
|                         |                                                      | 3-phosphoglycerate                                                         | 0.98                   | 1.02 |
|                         |                                                      | phosphoenolpyruvate (PEP)                                                  | 0.84                   | 1.08 |
|                         |                                                      | pyruvate                                                                   | 0.81                   | 1.23 |
|                         |                                                      | lactate                                                                    | 1.08                   | 1.14 |
|                         |                                                      | glycerate                                                                  | 0.78                   | 0.99 |

|                                           |                                                   |                                       |             |             |
|-------------------------------------------|---------------------------------------------------|---------------------------------------|-------------|-------------|
| Carbohydrate                              | Pentose Phosphate Pathway                         | sedoheptulose-7-phosphate             | 0.90        | 1.00        |
|                                           | Pentose Metabolism                                | ribose                                | 1.12        | 1.14        |
|                                           | Fructose, Mannose and Galactose Metabolism        | mannitol/sorbitol                     | 0.89        | <b>2.38</b> |
|                                           |                                                   | mannose                               | 1.11        | 0.96        |
|                                           |                                                   | galactitol (dulcitol)                 | 0.87        | 1.01        |
|                                           | Nucleotide Sugar                                  | UDP-glucose/UDP-galactose             | <b>2.07</b> | 1.17        |
|                                           |                                                   | UDP-glucuronate                       | 0.89        | <b>1.37</b> |
|                                           |                                                   | UDP-N-acetylglucosamine/galactosamine | 0.82        | 1.24        |
|                                           | Aminosugar Metabolism                             | N-acetylglucosamine 6-phosphate       | <b>0.63</b> | 1.24        |
|                                           |                                                   | N-acetyl-glucosamine 1-phosphate      | 1.19        | 1.04        |
|                                           |                                                   | N-acetylneuraminate                   | 0.95        | <b>1.14</b> |
|                                           |                                                   | N-acetylglucosaminylasparagine        | 0.91        | 1.06        |
|                                           |                                                   | erythronate*                          | 1.02        | 1.05        |
| N-acetylglucosamine/N-acetylgalactosamine |                                                   | 0.87                                  | 1.12        |             |
| N-glycolylneuraminate                     |                                                   | 1.14                                  | 1.13        |             |
| Energy                                    | TCA Cycle                                         | citrate                               | <b>1.26</b> | 1.01        |
|                                           |                                                   | aconitate [cis or trans]              | <b>1.39</b> | 1.22        |
|                                           |                                                   | isocitrate                            | 1.52        | 1.14        |
|                                           |                                                   | alpha-ketoglutarate                   | 1.14        | 1.03        |
|                                           |                                                   | fumarate                              | 0.84        | 1.20        |
|                                           |                                                   | malate                                | 0.99        | 1.29        |
|                                           | Oxidative Phosphorylation                         | acetylphosphate                       | 1.08        | 0.77        |
|                                           |                                                   | phosphate                             | 1.04        | 0.99        |
| Lipid                                     | Long Chain Saturated Fatty Acid                   | myristate (14:0)                      | 0.89        | 0.84        |
|                                           |                                                   | pentadecanoate (15:0)                 | 1.03        | 0.79        |
|                                           |                                                   | palmitate (16:0)                      | 0.97        | 0.77        |
|                                           |                                                   | margarate (17:0)                      | 1.21        | 0.85        |
|                                           |                                                   | stearate (18:0)                       | 1.05        | 0.81        |
|                                           |                                                   | nonadecanoate (19:0)                  | 1.08        | 0.85        |
|                                           |                                                   | arachidate (20:0)                     | 0.95        | 0.99        |
|                                           | Long Chain Monounsaturated Fatty Acid             | palmitoleate (16:1n7)                 | 0.92        | 0.85        |
|                                           |                                                   | 10-heptadecenoate (17:1n7)            | 1.08        | 0.91        |
|                                           |                                                   | oleate/vaccenate (18:1)               | 0.94        | 0.94        |
|                                           |                                                   | 10-nonadecenoate (19:1n9)             | 1.07        | 0.98        |
|                                           |                                                   | eicosenoate (20:1)                    | 0.89        | 1.15        |
|                                           |                                                   | erucate (22:1n9)                      | 0.86        | 1.21        |
|                                           | Long Chain Polyunsaturated Fatty Acid (n3 and n6) | tetradecadienoate (14:2)*             | <b>1.77</b> | 0.96        |
|                                           |                                                   | stearidonate (18:4n3)                 | 0.95        | <b>0.74</b> |
|                                           |                                                   | eicosapentaenoate (EPA; 20:5n3)       | 0.90        | <b>0.64</b> |
|                                           |                                                   | docosapentaenoate (n3 DPA; 22:5n3)    | 1.18        | 0.98        |
|                                           |                                                   | docosahexaenoate (DHA; 22:6n3)        | <b>1.59</b> | 1.03        |
| docosatrienoate (22:3n3)                  |                                                   | 1.37                                  | <b>1.41</b> |             |

Lipid

|                                                              |                                             |      |      |
|--------------------------------------------------------------|---------------------------------------------|------|------|
| Long Chain Polyunsaturated Fatty Acid (n3 and n6)            | nisinate (24:6n3)                           | 1.70 | 1.19 |
|                                                              | hexadecadienoate (16:2n6)                   | 0.86 | 0.99 |
|                                                              | linoleate (18:2n6)                          | 1.00 | 0.99 |
|                                                              | linolenate [alpha or gamma; (18:3n3 or 6)]  | 1.07 | 0.91 |
|                                                              | dihomo-linoleate (20:2n6)                   | 1.07 | 1.11 |
|                                                              | dihomo-linolenate (20:3n3 or n6)            | 1.11 | 1.01 |
|                                                              | arachidonate (20:4n6)                       | 1.21 | 1.05 |
|                                                              | docosatrienoate (22:3n6)*                   | 1.08 | 1.19 |
|                                                              | adrenate (22:4n6)                           | 1.07 | 1.06 |
|                                                              | docosadienoate (22:2n6)                     | 1.07 | 1.11 |
|                                                              | mead acid (20:3n9)                          | 0.82 | 0.87 |
| Fatty Acid, Branched                                         | (14 or 15)-methylpalmitate (a17:0 or i17:0) | 1.10 | 0.86 |
|                                                              | (16 or 17)-methylstearate (a19:0 or i19:0)  | 1.11 | 0.77 |
| Fatty Acid, Dicarboxylate                                    | glutarate (C5-DC)                           | 1.41 | 0.59 |
|                                                              | azelate (C9-DC)                             | 0.99 | 0.91 |
|                                                              | dodecadienoate (12:2)*                      | 1.00 | 1.00 |
| Fatty Acid Metabolism (also BCAA Metabolism)                 | butyrylcarnitine (C4)                       | 1.14 | 0.93 |
|                                                              | propionylcarnitine (C3)                     | 1.90 | 1.21 |
|                                                              | methylmalonate (MMA)                        | 0.94 | 1.14 |
| Fatty Acid Metabolism (Acyl Carnitine, Short Chain)          | acetylcarnitine (C2)                        | 1.13 | 1.48 |
| Fatty Acid Metabolism (Acyl Carnitine, Long Chain Saturated) | palmitoylcarnitine (C16)                    | 1.86 | 1.19 |
|                                                              | stearoylcarnitine (C18)                     | 2.85 | 1.45 |
|                                                              | lignoceroylcarnitine (C24)*                 | 2.67 | 2.01 |
|                                                              | cerotoylcarnitine (C26)*                    | 1.44 | 1.38 |
| Fatty Acid Metabolism (Acyl Carnitine, Monounsaturated)      | oleoylcarnitine (C18:1)                     | 3.00 | 1.92 |
|                                                              | nervonoylcarnitine (C24:1)*                 | 2.26 | 2.52 |
|                                                              | ximenoylcarnitine (C26:1)*                  | 1.55 | 1.67 |
| Carnitine Metabolism                                         | deoxycarnitine                              | 1.48 | 1.32 |
|                                                              | carnitine                                   | 0.96 | 0.99 |
| Fatty Acid, Monohydroxy                                      | 2-hydroxypalmitate                          | 1.31 | 1.04 |
|                                                              | 2-hydroxyoleate                             | 1.22 | 1.15 |
|                                                              | 2-hydroxystearate                           | 1.60 | 1.28 |
|                                                              | 3-hydroxylaurate                            | 1.31 | 0.96 |
|                                                              | 13-HODE + 9-HODE                            | 1.13 | 1.01 |
| Endocannabinoid                                              | oleoyl ethanolamide                         | 1.10 | 0.94 |
|                                                              | palmitoyl ethanolamide                      | 1.12 | 1.03 |
|                                                              | stearoyl ethanolamide                       | 1.45 | 1.20 |
|                                                              | linoleoyl ethanolamide                      | 1.04 | 0.95 |
| Inositol Metabolism                                          | myo-inositol                                | 0.78 | 1.37 |
| Phospholipid Metabolism                                      | choline                                     | 1.11 | 1.38 |
|                                                              | choline phosphate                           | 0.62 | 1.10 |

Lipid

|                               |                                                   |      |      |
|-------------------------------|---------------------------------------------------|------|------|
|                               | glycerophosphorylcholine (GPC)                    | 1.19 | 0.78 |
|                               | phosphoethanolamine                               | 1.93 | 1.24 |
|                               | glycerophosphoethanolamine                        | 1.36 | 0.76 |
|                               | glycerophosphoserine*                             | 1.09 | 0.73 |
|                               | glycerophosphoinositol*                           | 1.07 | 0.97 |
| Phosphatidylcholine (PC)      | 1-myristoyl-2-palmitoyl-GPC (14:0/16:0)           | 1.22 | 0.99 |
|                               | 1-myristoyl-2-arachidonoyl-GPC (14:0/20:4)*       | 1.45 | 0.97 |
|                               | 1,2-dipalmitoyl-GPC (16:0/16:0)                   | 1.36 | 1.01 |
|                               | 1-palmitoyl-2-palmitoleoyl-GPC (16:0/16:1)*       | 1.07 | 0.80 |
|                               | 1-palmitoyl-2-stearoyl-GPC (16:0/18:0)            | 1.91 | 1.16 |
|                               | 1-palmitoyl-2-oleoyl-GPC (16:0/18:1)              | 1.17 | 0.86 |
|                               | 1-palmitoyl-2-linoleoyl-GPC (16:0/18:2)           | 1.08 | 0.76 |
|                               | 1-palmitoyl-2-gamma-linolenoyl-GPC (16:0/18:3n6)* | 1.16 | 0.93 |
| Phosphatidylcholine (PC)      | 1-palmitoyl-2-arachidonoyl-GPC (16:0/20:4n6)      | 1.18 | 0.78 |
|                               | 1,2-distearoyl-GPC (18:0/18:0)                    | 1.81 | 2.09 |
|                               | 1-stearoyl-2-oleoyl-GPC (18:0/18:1)               | 1.22 | 0.98 |
|                               | 1-stearoyl-2-arachidonoyl-GPC (18:0/20:4)         | 1.35 | 0.81 |
|                               | 1-oleoyl-2-linoleoyl-GPC (18:1/18:2)*             | 1.09 | 0.81 |
|                               | 1-oleoyl-2-docosaheptaenoyl-GPC (18:1/22:6)*      | 1.61 | 0.95 |
|                               | 1,2-dilinoleoyl-GPC (18:2/18:2)                   | 1.10 | 0.78 |
|                               | 1-linoleoyl-2-linolenoyl-GPC (18:2/18:3)*         | 1.10 | 0.76 |
| Phosphatidylethanolamine (PE) | 1,2-dipalmitoyl-GPE (16:0/16:0)*                  | 1.16 | 0.93 |
|                               | 1-palmitoyl-2-oleoyl-GPE (16:0/18:1)              | 0.88 | 0.73 |
|                               | 1-palmitoyl-2-linoleoyl-GPE (16:0/18:2)           | 0.89 | 0.75 |
|                               | 1-palmitoleoyl-2-oleoyl-GPE (16:1/18:1)*          | 0.67 | 0.61 |
|                               | 1-stearoyl-2-oleoyl-GPE (18:0/18:1)               | 1.11 | 0.94 |
|                               | 1-stearoyl-2-linoleoyl-GPE (18:0/18:2)*           | 0.96 | 0.70 |
|                               | 1-stearoyl-2-arachidonoyl-GPE (18:0/20:4)         | 1.17 | 0.83 |
|                               | 1,2-dioleoyl-GPE (18:1/18:1)                      | 0.92 | 0.93 |
|                               | 1-oleoyl-2-linoleoyl-GPE (18:1/18:2)*             | 0.89 | 0.78 |
|                               | 1-oleoyl-2-arachidonoyl-GPE (18:1/20:4)*          | 1.26 | 0.90 |
| Phosphatidylserine (PS)       | 1-palmitoyl-2-oleoyl-GPS (16:0/18:1)              | 1.00 | 0.81 |
|                               | 1-stearoyl-2-oleoyl-GPS (18:0/18:1)               | 1.28 | 1.24 |
|                               | 1-stearoyl-2-linoleoyl-GPS (18:0/18:2)            | 0.99 | 0.76 |
| Phosphatidylglycerol (PG)     | 1-palmitoyl-2-oleoyl-GPG (16:0/18:1)              | 0.97 | 0.93 |
|                               | 1,2-distearoyl-GPG (18:0/18:0)                    | 1.60 | 1.27 |
|                               | 1-stearoyl-2-oleoyl-GPG (18:0/18:1)               | 1.34 | 1.07 |
| Phosphatidylinositol (PI)     | 1-palmitoyl-2-oleoyl-GPI (16:0/18:1)*             | 1.11 | 0.67 |
|                               | 1-palmitoyl-2-arachidonoyl-GPI (16:0/20:4)*       | 1.23 | 0.79 |
|                               | 1-stearoyl-2-oleoyl-GPI (18:0/18:1)*              | 1.09 | 0.80 |
|                               | 1-stearoyl-2-linoleoyl-GPI (18:0/18:2)            | 1.03 | 0.74 |
|                               | 1,2-dioleoyl-GPI (18:1/18:1)                      | 0.81 | 0.85 |
|                               | 1-stearoyl-2-arachidonoyl-GPI (18:0/20:4)         | 1.31 | 1.10 |

|                                               |                                          |                                                        |                                    |      |
|-----------------------------------------------|------------------------------------------|--------------------------------------------------------|------------------------------------|------|
|                                               | 1-oleoyl-2-arachidonoyl-GPI (18:1/20:4)* | 1.15                                                   | 0.92                               |      |
| Lysophospholipid                              | 1-palmitoyl-GPC (16:0)                   | 0.70                                                   | 0.66                               |      |
|                                               | 2-palmitoyl-GPC (16:0)*                  | 0.86                                                   | 0.79                               |      |
|                                               | 1-palmitoleoyl-GPC (16:1)*               | 0.49                                                   | 0.43                               |      |
|                                               | 2-palmitoleoyl-GPC (16:1)*               | 1.10                                                   | 1.05                               |      |
|                                               | 1-stearoyl-GPC (18:0)                    | 0.82                                                   | 0.71                               |      |
|                                               | 1-oleoyl-GPC (18:1)                      | 0.72                                                   | 0.50                               |      |
|                                               | 1-linoleoyl-GPC (18:2)                   | 0.60                                                   | 0.59                               |      |
|                                               | 1-lignoceroyl-GPC (24:0)                 | 0.84                                                   | 0.72                               |      |
|                                               | 1-palmitoyl-GPE (16:0)                   | 0.61                                                   | 0.61                               |      |
|                                               | 1-stearoyl-GPE (18:0)                    | 0.75                                                   | 0.66                               |      |
|                                               | 2-stearoyl-GPE (18:0)*                   | 0.85                                                   | 0.49                               |      |
|                                               | 1-oleoyl-GPE (18:1)                      | 0.60                                                   | 0.72                               |      |
|                                               | 1-linoleoyl-GPE (18:2)*                  | 0.74                                                   | 0.67                               |      |
|                                               | 1-arachidonoyl-GPE (20:4n6)*             | 1.11                                                   | 0.70                               |      |
|                                               | 1-stearoyl-GPS (18:0)*                   | 0.77                                                   | 0.66                               |      |
| Lysophospholipid                              | 1-oleoyl-GPS (18:1)                      | 0.56                                                   | 0.60                               |      |
|                                               | 1-palmitoyl-GPG (16:0)*                  | 0.82                                                   | 0.75                               |      |
|                                               | 1-stearoyl-GPG (18:0)                    | 0.94                                                   | 0.85                               |      |
|                                               | 1-oleoyl-GPG (18:1)*                     | 1.05                                                   | 0.84                               |      |
|                                               | 1-linoleoyl-GPG (18:2)*                  | 1.37                                                   | 0.84                               |      |
|                                               | 1-palmitoyl-GPI (16:0)                   | 0.58                                                   | 0.62                               |      |
|                                               | 1-stearoyl-GPI (18:0)                    | 0.63                                                   | 0.67                               |      |
|                                               | 1-oleoyl-GPI (18:1)                      | 0.66                                                   | 0.66                               |      |
|                                               | 1-linoleoyl-GPI (18:2)*                  | 0.82                                                   | 0.65                               |      |
|                                               | 1-arachidonoyl-GPI (20:4)*               | 1.15                                                   | 0.88                               |      |
| Lipid                                         | Plasmalogen                              | 1-(1-enyl-palmitoyl)-2-oleoyl-GPE (P-16:0/18:1)*       | 1.20                               | 0.99 |
|                                               |                                          | 1-(1-enyl-palmitoyl)-2-linoleoyl-GPE (P-16:0/18:2)*    | 1.16                               | 0.69 |
|                                               |                                          | 1-(1-enyl-palmitoyl)-2-palmitoyl-GPC (P-16:0/16:0)*    | 1.25                               | 1.01 |
|                                               |                                          | 1-(1-enyl-palmitoyl)-2-palmitoleoyl-GPC (P-16:0/16:1)* | 1.16                               | 0.95 |
|                                               |                                          | 1-(1-enyl-palmitoyl)-2-arachidonoyl-GPE (P-16:0/20:4)* | 1.23                               | 0.98 |
|                                               |                                          | 1-(1-enyl-palmitoyl)-2-oleoyl-GPC (P-16:0/18:1)*       | 1.20                               | 0.93 |
|                                               |                                          | 1-(1-enyl-stearoyl)-2-oleoyl-GPE (P-18:0/18:1)         | 1.41                               | 1.31 |
|                                               |                                          | 1-(1-enyl-stearoyl)-2-linoleoyl-GPE (P-18:0/18:2)*     | 1.32                               | 0.84 |
|                                               |                                          | 1-(1-enyl-palmitoyl)-2-arachidonoyl-GPC (P-16:0/20:4)* | 1.19                               | 1.01 |
|                                               |                                          | 1-(1-enyl-palmitoyl)-2-linoleoyl-GPC (P-16:0/18:2)*    | 1.29                               | 0.85 |
|                                               |                                          | 1-(1-enyl-stearoyl)-2-arachidonoyl-GPE (P-18:0/20:4)*  | 1.56                               | 1.17 |
|                                               |                                          | Lysoplasmalogen                                        | 1-(1-enyl-palmitoyl)-GPC (P-16:0)* | 0.82 |
| 1-(1-enyl-palmitoyl)-GPE (P-16:0)*            | 0.76                                     |                                                        | 0.73                               |      |
| 1-(1-enyl-oleoyl)-GPE (P-18:1)*               | 0.73                                     |                                                        | 0.76                               |      |
| 1-(1-enyl-stearoyl)-GPE (P-18:0)*             | 0.96                                     |                                                        | 0.88                               |      |
| 1-(1-enyl-oleoyl)-2-oleoyl-GPE (P-18:1/18:1)* | 1.01                                     |                                                        | 1.00                               |      |
| Glycerolipid Metabolism                       | glycerol                                 | 1.08                                                   | 1.23                               |      |

Lipid

|                                   |                                                  |                                 |      |
|-----------------------------------|--------------------------------------------------|---------------------------------|------|
|                                   | glycerol 3-phosphate                             | 1.03                            | 0.95 |
|                                   | glycerophosphoglycerol                           | 1.13                            | 0.87 |
| Monoacylglycerol                  | 1-pentadecanoylglycerol (15:0)                   | 0.70                            | 1.05 |
|                                   | 1-palmitoylglycerol (16:0)                       | 1.50                            | 0.76 |
|                                   | 1-margaroylglycerol (17:0)                       | 1.56                            | 1.06 |
|                                   | 1-oleoylglycerol (18:1)                          | 1.16                            | 0.86 |
|                                   | 1-linoleoylglycerol (18:2)                       | 0.76                            | 1.09 |
|                                   | 2-dihomo-linoleoylglycerol (20:2)*               | 0.77                            | 0.75 |
|                                   | 1-dihomo-linolenylglycerol (20:3)                | 0.84                            | 0.51 |
|                                   | 1-arachidonoylglycerol (20:4)                    | 0.82                            | 0.97 |
|                                   | 2-palmitoylglycerol (16:0)                       | 1.01                            | 0.77 |
|                                   | 2-palmitoleoylglycerol (16:1)*                   | 0.57                            | 0.58 |
|                                   | 2-oleoylglycerol (18:1)                          | 1.05                            | 0.66 |
|                                   | 2-linoleoylglycerol (18:2)                       | 0.77                            | 0.95 |
|                                   | 2-arachidonoylglycerol (20:4)                    | 0.76                            | 0.80 |
|                                   | Monoacylglycerol                                 | 1-heptadecenoylglycerol (17:1)* | 0.66 |
| 2-heptadecenoylglycerol (17:1)*   |                                                  | 0.70                            | 0.88 |
| 1-meadoylglycerol (20:3n9)*       |                                                  | 1.70                            | 0.46 |
| 1-dihomo-linoleoylglycerol (20:2) |                                                  | 0.48                            | 0.91 |
|                                   |                                                  |                                 |      |
| Diacylglycerol                    | diacylglycerol (14:0/18:1, 16:0/16:1) [2]*       | 0.51                            | 0.72 |
|                                   | diacylglycerol (16:1/18:2 [2], 16:0/18:3 [1])*   | 0.91                            | 0.72 |
|                                   | palmitoyl-oleoyl-glycerol (16:0/18:1) [2]*       | 0.80                            | 0.83 |
|                                   | palmitoyl-linoleoyl-glycerol (16:0/18:2) [2]*    | 1.11                            | 0.66 |
|                                   | palmitoleoyl-oleoyl-glycerol (16:1/18:1) [2]*    | 0.57                            | 0.59 |
|                                   | palmitoyl-arachidonoyl-glycerol (16:0/20:4) [2]* | 1.01                            | 0.73 |
|                                   | oleoyl-oleoyl-glycerol (18:1/18:1) [2]*          | 0.94                            | 1.09 |
|                                   | oleoyl-linoleoyl-glycerol (18:1/18:2) [1]        | 0.93                            | 0.94 |
|                                   | oleoyl-linoleoyl-glycerol (18:1/18:2) [2]        | 0.96                            | 0.83 |
|                                   | linoleoyl-linolenoyl-glycerol (18:2/18:3) [2]*   | 1.33                            | 0.59 |
|                                   | stearoyl-arachidonoyl-glycerol (18:0/20:4) [1]*  | 0.92                            | 0.93 |
|                                   | stearoyl-arachidonoyl-glycerol (18:0/20:4) [2]*  | 1.41                            | 1.02 |
|                                   | oleoyl-arachidonoyl-glycerol (18:1/20:4) [2]*    | 1.30                            | 0.87 |
| Sphingolipid Synthesis            | sphinganine                                      | 0.73                            | 0.71 |
|                                   | sphingadienine                                   | 0.53                            | 0.34 |
|                                   | phytosphingosine                                 | 0.53                            | 0.51 |
| Dihydroceramides                  | N-palmitoyl-sphinganine (d18:0/16:0)             | 0.97                            | 1.52 |
| Ceramides                         | N-palmitoyl-sphingosine (d18:1/16:0)             | 0.78                            | 0.73 |
|                                   | N-stearoyl-sphingosine (d18:1/18:0)*             | 1.03                            | 1.21 |
|                                   | N-palmitoyl-sphingadienine (d18:2/16:0)*         | 0.89                            | 0.40 |
|                                   | N-palmitoyl-heptadecasphingosine (d17:1/16:0)*   | 0.82                            | 0.67 |
|                                   | ceramide (d18:1/14:0, d16:1/16:0)*               | 0.78                            | 0.68 |
|                                   | ceramide (d18:1/17:0, d17:1/18:0)*               | 1.19                            | 1.01 |
|                                   | glycosyl-N-palmitoyl-sphingosine (d18:1/16:0)    | 0.97                            | 0.54 |



|                       |                                                        |                                                                 |      |      |
|-----------------------|--------------------------------------------------------|-----------------------------------------------------------------|------|------|
| Lipid                 | Hexosylceramides (HCER)                                | glycosyl-N-stearoyl-sphingosine (d18:1/18:0)                    | 0.88 | 0.66 |
|                       |                                                        | glycosyl ceramide (d18:1/20:0, d16:1/22:0)*                     | 1.04 | 1.00 |
|                       |                                                        | glycosyl ceramide (d18:2/24:1, d18:1/24:2)*                     | 1.06 | 0.38 |
|                       | Lactosylceramides (LCER)                               | lactosyl-N-palmitoyl-sphingosine (d18:1/16:0)                   | 0.86 | 0.63 |
|                       |                                                        | lactosyl-N-nervonoyl-sphingosine (d18:1/24:1)*                  | 0.89 | 0.86 |
|                       | Dihydrosphingomyelins                                  | myristoyl dihydrosphingomyelin (d18:0/14:0)*                    | 0.94 | 1.67 |
|                       |                                                        | palmitoyl dihydrosphingomyelin (d18:0/16:0)*                    | 1.05 | 1.66 |
|                       |                                                        | behenoyl dihydrosphingomyelin (d18:0/22:0)*                     | 1.20 | 2.49 |
|                       |                                                        | sphingomyelin (d18:0/18:0, d19:0/17:0)*                         | 1.08 | 3.52 |
|                       |                                                        | sphingomyelin (d18:0/20:0, d16:0/22:0)*                         | 1.20 | 3.66 |
|                       | Sphingomyelins                                         | palmitoyl sphingomyelin (d18:1/16:0)                            | 1.11 | 1.00 |
|                       |                                                        | hydroxypalmitoyl sphingomyelin (d18:1/16:0(OH))**               | 1.66 | 1.55 |
|                       |                                                        | stearoyl sphingomyelin (d18:1/18:0)                             | 1.38 | 1.38 |
|                       |                                                        | behenoyl sphingomyelin (d18:1/22:0)*                            | 1.19 | 1.45 |
|                       |                                                        | lignoceroyl sphingomyelin (d18:1/24:0)                          | 1.23 | 1.34 |
|                       |                                                        | sphingomyelin (d18:2/24:2)*                                     | 1.45 | 0.96 |
|                       |                                                        | sphingomyelin (d17:1/14:0, d16:1/15:0)*                         | 0.99 | 1.15 |
|                       |                                                        | sphingomyelin (d18:1/14:0, d16:1/16:0)*                         | 1.04 | 1.00 |
|                       |                                                        | sphingomyelin (d18:2/14:0, d18:1/14:1)*                         | 1.16 | 0.90 |
|                       |                                                        | sphingomyelin (d17:1/16:0, d18:1/15:0, d16:1/17:0)*             | 1.06 | 0.98 |
|                       | Sphingomyelins                                         | sphingomyelin (d18:2/16:0, d18:1/16:1)*                         | 1.15 | 0.70 |
|                       |                                                        | sphingomyelin (d18:1/17:0, d17:1/18:0, d19:1/16:0)              | 1.38 | 1.19 |
|                       |                                                        | sphingomyelin (d18:1/18:1, d18:2/18:0)                          | 1.54 | 1.38 |
|                       |                                                        | sphingomyelin (d18:1/20:0, d16:1/22:0)*                         | 1.20 | 1.34 |
|                       |                                                        | sphingomyelin (d18:1/21:0, d17:1/22:0, d16:1/23:0)*             | 1.23 | 0.99 |
|                       |                                                        | sphingomyelin (d18:1/22:1, d18:2/22:0, d16:1/24:1)*             | 1.03 | 1.08 |
|                       |                                                        | sphingomyelin (d18:2/23:0, d18:1/23:1, d17:1/24:1)*             | 1.09 | 1.15 |
|                       |                                                        | sphingomyelin (d18:1/24:1, d18:2/24:0)*                         | 1.19 | 0.99 |
|                       |                                                        | sphingomyelin (d18:2/24:1, d18:1/24:2)*                         | 1.10 | 1.11 |
|                       |                                                        | sphingomyelin (d18:1/25:0, d19:0/24:1, d20:1/23:0, d19:1/24:0)* | 1.44 | 1.05 |
| Ceramide PEs          | palmitoyl-sphingosine-phosphoethanolamine (d18:1/16:0) | 1.41                                                            | 1.13 |      |
| Sphingosines          | sphingosine                                            | 0.51                                                            | 0.45 |      |
|                       | hexadecasphingosine (d16:1)*                           | 0.59                                                            | 0.40 |      |
|                       | heptadecasphingosine (d17:1)                           | 0.64                                                            | 0.50 |      |
|                       | eicosanoylsphingosine (d20:1)*                         | 0.76                                                            | 0.63 |      |
| Mevalonate Metabolism | 3-hydroxy-3-methylglutarate                            | 1.34                                                            | 1.09 |      |
| Sterol                | cholesterol                                            | 1.03                                                            | 1.09 |      |
|                       | 4-cholesten-3-one                                      | 0.72                                                            | 0.77 |      |
|                       | 7-hydroxycholesterol (alpha or beta)                   | 0.99                                                            | 0.81 |      |
| Nucleotide            | Purine Metabolism, (Hypo)Xanthine/Inosine containing   | AICA ribonucleotide                                             | 1.00 | 2.03 |
|                       |                                                        | inosine                                                         | 1.11 | 1.09 |
|                       |                                                        | hypoxanthine                                                    | 1.00 | 1.36 |
|                       |                                                        | xanthine                                                        | 0.79 | 0.58 |

|                                              |                                               |                                           |                                                |      |      |
|----------------------------------------------|-----------------------------------------------|-------------------------------------------|------------------------------------------------|------|------|
| Nucleotide                                   |                                               | 2'-deoxyinosine                           | 0.04                                           | 0.04 |      |
|                                              |                                               | urate                                     | 0.57                                           | 0.30 |      |
|                                              | Purine Metabolism,<br>Adenine containing      |                                           | adenosine 5'-triphosphate (ATP)                | 0.83 | 0.72 |
|                                              |                                               |                                           | adenosine 5'-monophosphate (AMP)               | 0.84 | 0.69 |
|                                              |                                               |                                           | adenosine 3'-monophosphate (3'-AMP)            | 0.78 | 0.57 |
|                                              |                                               |                                           | adenosine 2'-monophosphate (2'-AMP)            | 0.82 | 0.45 |
|                                              |                                               |                                           | adenosine                                      | 1.10 | 1.08 |
|                                              |                                               |                                           | adenine                                        | 0.27 | 0.08 |
|                                              |                                               |                                           | N6-methyladenosine                             | 0.80 | 1.31 |
|                                              |                                               |                                           | N6,N6-dimethyladenosine                        | 1.01 | 1.48 |
|                                              |                                               | 2'-deoxyadenosine                         | 0.01                                           | 0.00 |      |
|                                              | Purine Metabolism,<br>Guanine containing      |                                           | guanosine 5'- diphosphate (GDP)                | 0.98 | 1.37 |
|                                              |                                               |                                           | guanosine 5'- monophosphate (5'-GMP)           | 0.88 | 0.65 |
|                                              |                                               |                                           | guanosine 3'-monophosphate (3'-GMP)            | 0.75 | 0.56 |
|                                              |                                               |                                           | guanosine                                      | 1.04 | 1.70 |
|                                              |                                               |                                           | guanine                                        | 1.85 | 7.93 |
|                                              | Purine Metabolism,<br>Guanine containing      |                                           | 7-methylguanine                                | 0.89 | 0.89 |
|                                              |                                               |                                           | 2'-deoxyguanosine                              | 0.04 | 0.07 |
|                                              | Pyrimidine Metabolism,<br>Orotate containing  |                                           | orotate                                        | 1.94 | 1.52 |
|                                              | Pyrimidine Metabolism,<br>Uracil containing   |                                           | uridine 3'-monophosphate (3'-UMP)              | 0.90 | 0.66 |
|                                              |                                               |                                           | uridine                                        | 1.10 | 1.14 |
|                                              |                                               |                                           | uracil                                         | 0.76 | 1.38 |
|                                              |                                               |                                           | pseudouridine                                  | 0.79 | 1.45 |
|                                              |                                               |                                           | 3-ureidopropionate                             | 0.52 | 0.81 |
|                                              | Pyrimidine Metabolism,<br>Cytidine containing |                                           | cytidine 5'-monophosphate (5'-CMP)             | 1.33 | 1.11 |
|                                              |                                               |                                           | cytidine 2' or 3'-monophosphate (2' or 3'-CMP) | 0.63 | 0.51 |
|                                              |                                               |                                           | cytidine                                       | 0.74 | 1.09 |
|                                              |                                               |                                           | cytosine                                       | 0.52 | 0.39 |
|                                              |                                               | 2'-deoxycytidine 5'-monophosphate         | 0.05                                           | 0.05 |      |
|                                              |                                               | 2'-deoxycytidine                          | 0.16                                           | 0.08 |      |
|                                              |                                               | 2'-O-methylcytidine                       | 0.57                                           | 1.22 |      |
| Pyrimidine Metabolism,<br>Thymine containing |                                               | thymidine 5'-monophosphate                | 0.80                                           | 0.80 |      |
|                                              |                                               | thymidine                                 | 1.00                                           | 1.00 |      |
| Purine and Pyrimidine<br>Metabolism          |                                               | methylphosphate                           | 0.76                                           | 0.89 |      |
| Cofactors<br>and Vitamins                    | Nicotinate and<br>Nicotinamide Metabolism     | nicotinamide                              | 0.64                                           | 0.97 |      |
|                                              |                                               | nicotinamide ribonucleotide (NMN)         | 0.83                                           | 1.00 |      |
|                                              |                                               | nicotinamide riboside                     | 1.30                                           | 0.81 |      |
|                                              |                                               | nicotinamide adenine dinucleotide (NAD+)  | 0.87                                           | 0.81 |      |
|                                              |                                               | 1-methylnicotinamide                      | 0.80                                           | 0.60 |      |
|                                              |                                               | adenosine 5'-diphosphoribose (ADP-ribose) | 0.51                                           | 0.73 |      |
|                                              | Riboflavin Metabolism                         | riboflavin (Vitamin B2)                   | 0.68                                           | 0.76 |      |

|                                     |                       |                                       |              |             |
|-------------------------------------|-----------------------|---------------------------------------|--------------|-------------|
|                                     |                       | flavin adenine dinucleotide (FAD)     | 1.00         | 0.97        |
| Pantothenate and CoA Metabolism     |                       | pantothenate                          | 0.86         | <b>0.86</b> |
|                                     |                       | pantetheine                           | 0.99         | 1.17        |
|                                     |                       | phosphopantetheine                    | 1.03         | 1.27        |
| Tocopherol Metabolism               |                       | alpha-tocopherol                      | 1.08         | <b>0.89</b> |
|                                     |                       | gamma-tocopherol/beta-tocopherol      | <b>0.58</b>  | 0.66        |
| Hemoglobin and Porphyrin Metabolism |                       | heme                                  | <b>0.45</b>  | 0.97        |
| Thiamine Metabolism                 |                       | thiamin (Vitamin B1)                  | <b>0.61</b>  | 1.17        |
| Vitamin A Metabolism                |                       | retinol (Vitamin A)                   | 0.86         | 0.96        |
| Vitamin B6 Metabolism               |                       | pyridoxine (Vitamin B6)               | 0.97         | 0.83        |
|                                     |                       | pyridoxamine                          | 1.24         | 0.98        |
|                                     |                       | pyridoxamine phosphate                | 0.95         | 0.89        |
|                                     |                       | pyridoxal phosphate                   | <b>0.74</b>  | 1.02        |
|                                     |                       | pyridoxal                             | 0.97         | 1.20        |
| Xenobiotics                         | Benzoate Metabolism   | hippurate                             | 1.02         | 0.99        |
|                                     |                       | p-cresol sulfate                      | <b>0.79</b>  | 0.90        |
| Xenobiotics                         | Food Component/Plant  | 3-formylindole                        | 0.97         | <b>0.78</b> |
|                                     |                       | ergothioneine                         | <b>0.43</b>  | 1.21        |
|                                     |                       | stachydrine                           | 1.02         | 1.02        |
|                                     |                       | methyl glucopyranoside (alpha + beta) | 1.26         | 0.94        |
|                                     |                       | Drug - Antibiotic                     | penicillin G | 1.02        |
| Xenobiotics                         | Drug - Antineoplastic | tamoxifen                             | <b>0.81</b>  | <b>0.73</b> |
|                                     | Chemical              | HEPES                                 | 1.13         | 0.91        |
|                                     |                       | 2,4-di-tert-butylphenol               | 0.91         | 0.93        |
|                                     |                       | phenol red                            | 1.02         | 0.89        |
|                                     |                       | thioprolone                           | 1.19         | 0.91        |
| 4-chlorobenzoic acid                |                       | 1.10                                  | <b>0.80</b>  |             |
